# Supplementary material for: Canines and carnassials as indicators of sociality in durophagous hyaenids: analyzing the past to understand the present
Source: PeerJ. 2020 Dec 15;8:e10541. doi: 10.7717/peerj.10541 (PMC7747684; doi:10.7717/peerj.10541)
Supplement: Table S1 — The references regarding their proveniences are in Coca-Ortega & Pérez-Claros (2019). If the original source only provides a mean, its corresponding sample size is in brackets. [file peerj-08-10541-s001.xls]

## Sheet: Upper Canine Length
Adcrocuta eximia	13.9	15.5	16.2	16.3	17	17	18	18.1	18.4	21.2
Chasmaporthetes bonisi	15
Chasmaporthetes lunensis	13.8	14.2	14.6	16	16	17.5	17.8	17.9	18.2	19.8	21.3	22.4	17.5
Crocuta crocuta (fossil)	13	14.5	14.5	14.5	15	15	15	15.1	15.1	15.5	15.7	15.7	15.7	15.8	15.8	16	16	16	16	16	16	16	16.2	16.2	16.5	16.5	16.5	16.7	16.7	16.8	16.9	17	17	17	17	17	17	17	17	17	17	17	17.2	17.4	17.4	17.5	17.5	17.5	17.5
Hyaena hyaena (fossil)	17.5	13 (12)
Hyaenictis aff. almerai	18.8
Hyaenictis wehaietu	14.2
Hyaenictitherium hyaenoides	12.4 (16)
Hyaenictitherium minimum	8.4	8.8	9.1	9.1
Hyaenictitherium parvum	12.5	14.5	11.7 (3)	12.4 (2)	12.7 (3)	12.8 (2)
Hyaenotherium wongii	9.3	10.5	12.5	12.8	11.6 (6)
Ictitherium ebu	10.7
Ictitherium ibericum	11.5
Ictitherium pannonicum	13.6
Ictitherium viverrinum	10	10.5	10.9 (6)
Ikelohyaena abronia	11.4	11.9	12.3
Miohyaenotherium bessarabicum	12.2	12.4	13.2	15
Pachycrocuta brevirostris	17	18	18.2	18.2	18.4	19.2	19.8	20.1	20.1	20.2	20.8	21	21	21	21.6	21.7	21.8	21.8	21.9	22.4	22.8	23	24	24.5
Palinhyaena reperta	11.5	12.8
Pliocrocuta perrieri	15.9	16.8	16.8	17	17	17.5	17.5	17.6	18.4	18.5	18.5	18.7	20	21.5	17.4 (3)	17.5 (2)	18.3 (2)
Plioviverrops faventinus	6.5
Plioviverrops orbignyi	4	4.1	4.5	4.6	4.7	5	5.4
Protictitherium crassum	6.8	7.6	8	8.8	9	7.4 (5)
Protictitherium gaillardi	6
Protictitherium thessalonikensis	5.8	5.9
Thalassictis montadai	14.2	14.4
Thalassictis robusta	9.5	7.9
Thalassictis spelaea	7.8	10.5	9.3 (8)
Tongxinictis primordialis	11.7
Werdelinus africanus	16	16
Crocuta crocuta (living)	14.3	14.8	14.8	14.9	15.3	15.3	15.5	15.5	15.5	15.6	15.6	15.7	17	17.3	17.6	17.7	18.9
Hyena hyena (living)	12.7	13.5	13.6	13.6	13.7	13.7	13.8	13.9	14	14.1	14.3	14.4	14.7	14.8	15	15	15.3
Parahyena brunnea (living)	14.5	15.1	15.1	15.2	15.7	16.1	16.3	16.3	16.3	16.5	16.5	16.5	16.5	16.6	18.5
[truncated: 16 more columns]

## Sheet: Upper Canine Width
Adcrocuta eximia	13.3	11	11.7	12.5	12.9	13.2	13.3	14.5	14.8
Chasmaporthetes bonisi	12
Chasmaporthetes lunensis	11.5	10.6	11	12.3	13.7	12.5	13.6	13.6	14.1	14	13.9	14.8
Crocuta crocuta (fossil)	10	10.4	10.5	11	11	11.5	11.8	12	12	12	12	12.2	12.2	12.3	12.4	12.4	12.5	12.5	12.7	12.8	12.8	12.8	12.8	12.9	13	13	13	13	13	13	13	13	13	13	13	13	13	13	13.1	13.2	13.2	13.3	13.4	13.5	13.6	13.6	13.7	13.7	13.8
Hyaena hyaena (fossil)	10.9	9.1 (12)
Hyaenictis aff. almerai	13.2
Hyaenictis wehaietu	10.1
Hyaenictitherium hyaenoides	8.6 (13)
Hyaenictitherium minimum	6.5	6.8	6.5
Hyaenictitherium parvum	8.4	9.4	11	11.2	8.4 (2)	8.9 (3)
Hyaenotherium wongii	6.8	8	9.1	9.5	8 (6)
Ictitherium ebu	6.7
Ictitherium ibericum	7.5
Ictitherium pannonicum	8.9
Ictitherium viverrinum	6.4	7.3	7.1 (6)
Ikelohyaena abronia	7.9	9.8	9.8
Miohyaenotherium bessarabicum	7.2	7.6	9.4
Pachycrocuta brevirostris	11.5	13.1	13.4	13.4	14.4	14.5	15	15	15.3	15.4	15.5	15.5	15.8	15.8	15.8	15.9	16	16.2	16.3	16.3	17	17.2
Palinhyaena reperta	7.4	7.6
Pliocrocuta perrieri	12	12.4	12.4	12.4	12.5	12.5	12.6	12.7	13.3	13.9	14.5	14.5	14.5	14.7	15	12.4 (2)	13 (3)	13.3 (2)
Plioviverrops faventinus	5.1
Plioviverrops orbignyi	3	3	3.2	3.3	3.3	3.4	3.7
Protictitherium crassum	4.6	5.8	5.8	5.3 (5)
Protictitherium gaillardi	4.5
Protictitherium thessalonikensis	4	4
Thalassictis montadai	10.2	10.7
Thalassictis robusta	5.6	6.4
Thalassictis spelaea	5.6	7.4	6.3 (13)
Tongxinictis primordialis	8
Werdelinus africanus	12	12
Crocuta crocuta (living)	9.9	10.3	10.3	10.5	10.5	10.6	10.7	10.7	10.8	10.8	11	11.1	11.2	11.3	11.7	12.8	13.3
Hyena hyena (living)	8.9	9.1	9.4	9.7	9.7	9.8	10	10.1	10.2	10.2	10.2	10.2	10.3	10.3	10.4	11	11.1
Parahyena brunnea (living)	10.8	10.9	11.6	11.6	11.6	11.7	11.8	11.9	11.9	11.9	12	12	12.1	12.1	13
[truncated: 18 more columns]

## Sheet: Lower Canine Length
Adcrocuta eximia	11	14	15	15.4	15.5	15.5	15.8	16	16	16.5	16.5	17.1	17.2	17.4	17.5	18	18.3	19.8	20	20
Chasmaporthetes australis	17.3(2)
Chasmaporthetes gansgriensis	16.2
Chasmaporthetes lunensis	13.9	15	15.1	15.1	15.2	15.3	15.8	16	16.1	16.5	16.7	17	17	17.5	17.8	18.6	19	19.3
Chasmaporthetes ossifragus	17
Crocuta crocuta (fossil)	13.5	13.8	14	14	14.4	14.4	14.5	14.7	14.9	15	15	15	15	15	15	15	15	15	15	15	15.2	15.2	15.5	15.5	15.6	15.7	16	16	16	16	16	16	16	16	16	16	16	16	16	16	16	16	16	16	16	16	16	16	16
Crocuta dietrichi	12.8
Hyaena hyaena (fossil)	12.9(15)
Hyaenictis aff. almerai	18.7	18.7
Hyaenictis almerai	14
Hyaenictis hendeyi	15.5
Hyaenictis wehaietu	12.1(2)	16.2
Hyaenictitherium hyaenoides	11.9(15)
Hyaenictitherium minimum	8	9.6
Hyaenictitherium parvum	13.8	13.9	12.2(6)	12.6(3)	12.9(2)	13.9(2)
Hyaenotherium wongii	9.6	10.4	10.5	10.6	10.7	10.8	10.9	11	11.5	11.7	11.8	12.1
Ictitherium ebu	9.1
Ictitherium ibericum	9.5
Ictitherium pannonicum	11.5	12.6
Ictitherium viverrinum	8.5	8.8	9	9	9.1	9.5	10	11	10.2(7)
Ikelohyaena abronia	12.4	13.4	12.7(6)
Metahyaena confector	9.8
Miohyaenotherium bessarabicum	11.5	12	13.3
Pachycrocuta brevirostris	18.1	19.7	20	20	20	20	20	20.1	20.2	20.3	20.6	20.8	21	21	21.2	21.4	21.5	21.5	22	22	22.3	22.4	22.5	22.6	23.6	23.7	24	24	24	24.1	21.3(3)
Palinhyaena reperta	9.4	9.5	13.1
Parahyaena brunnea (fossil)	16.1	16.9	17.3
Parahyaena howelli	12.9	13.3	13.8	14	14
Pliocrocuta perrieri	16.2	16.4	16.4	16.7	17.1	17.1	17.3	17.5	17.7	18	18	18	18.1	18.2	18.2	18.4	19	21	21.3	17.2(3)	18.2(2)	18.4(2)	19.2(2)	19.3(2)
Plioviverrops faventinus	6	6.2
Plioviverrops guerrini	5.2
Plioviverrops orbignyi	3.7	4.4	4.4	4.5	5	5	5.3
Protictitherium crassum	5.9	6	6.3	6.7	7	7.2	7.2	6.4(4)
Thalassictis montadai	12.8	12.9	14.3	14.3
Thalassictis robusta	10.2
Thalassictis spelaea	7.6	10.8	9.1(11)
Werdelinus africanus	16	16	16
Crocuta crocuta (living)	12.3	13	13.8	14	14.2	14.2	14.3	14.3	14.4	14.6	14.6	14.9	15	15.2	15.6	16.7	16.8	17.5	17.7
Hyena hyena (living)	13	13.2	13.5	13.7	13.9	13.9	14.1	14.4	14.4	14.6	14.8	15.1	15.3	15.6
Parahyena brunnea (living)	15.3	15.3	15.9	16.4	16.8	16.8	16.9	17	17.1	17.1	17.2	17.2	18	18.1	18.4
[truncated: 57 more columns]

## Sheet: Lower Canine Width
Adcrocuta eximia	11.7	12	12.1	12.4	12.7	13.2	13.3	13.3	13.5	14.3	14.3	15	15.4
Chasmaporthetes australis	12.5(2)
Chasmaporthetes gansgriensis	11.5
Chasmaporthetes lunensis	10.4	10.7	11.2	11.2	11.5	11.5	11.8	12	12	12.2	12.3	12.3	12.3	12.4	12.4	12.8	13	13.3	15.1
Chasmaporthetes ossifragus	13.2
Crocuta crocuta (fossil)	10	10.8	11	11.7	12	12	12	12	12	12.5	12.6	12.7	12.7	13	13	13	13	13	13	13	13	13	13	13	13	13	13	13	13	13	13	13	13	13	13	13	13	13	13	13	13	13	13	13.2	13.2	13.2	13.3	13.3	13.4
Crocuta dietrichi	9.6
Hyaena hyaena (fossil)	9.8(15)
Hyaenictis aff. almerai	13.2	13.2
Hyaenictis almerai	9
Hyaenictis hendeyi	11
Hyaenictis wehaietu	9.9(2)	11.4
Hyaenictitherium hyaenoides	8(13)
Hyaenictitherium minimum	6.9	8.3
Hyaenictitherium parvum	9.6	8.2(5)	8.5(3)	9.1(2)	9.2(2)
Hyaenotherium wongii	6.7	7.3	7.3	7.6	7.6	7.6	7.9	8	8	8.2	8.8
Ictitherium ebu	6.9
Ictitherium ibericum	7
Ictitherium pannonicum	7.5	7.7	8.3
Ictitherium viverrinum	6.1	6.2	6.2	7	7	7	7.2	7.5	8(7)
Ikelohyaena abronia	9.8	10.2	9.4(6)
Metahyaena confector	7.2
Miohyaenotherium bessarabicum	9	9.4	9.5
Pachycrocuta brevirostris	14.3	14.5	15.1	15.2	16	16	16.1	16.2	16.2	16.4	16.8	17	17	17	17.3	17.6	17.7	17.7	17.7	17.8	17.9	17.9	18	18	18	18.3	18.4	18.4
Palinhyaena reperta	6.4	6.7	9.8
Parahyaena brunnea (fossil)	11.8	11.9	13.1
Parahyaena howelli	10	10.4	10.7	10.9	12.3
Pliocrocuta perrieri	11	12.4	12.5	12.6	13	13.2	13.2	13.2	13.4	13.5	13.5	13.6	13.6	13.6	14	14.1	14.2	14.3	14.7	16	12.1(2)	14.3(2)	15.2(2)
Plioviverrops faventinus	4.2	5.4
Plioviverrops guerrini	4.7
Plioviverrops orbignyi	3.3	3.4	3.8	3.8	4	4.2	4.2
Protictitherium crassum	4	4.5	4.6	5.1	5.3	5.4	5.5	4.4(4)
Thalassictis montadai	9.5	9.7	10.7	12.1
Thalassictis robusta	6.9
Thalassictis spelaea	5.3	6.8	6(12)
Werdelinus africanus	12	13
Crocuta crocuta (living)	10.4	10.5	10.9	10.9	11	11.1	11.1	11.1	11.1	11.3	11.5	11.5	11.9	11.9	12.1	12.2	12.4	12.9	13.2
Hyena hyena (living)	9.6	10.1	10.3	10.4	10.4	10.6	10.7	10.7	10.8	10.8	10.9	11.2	11.2	11.3
Parahyena brunnea (living)	11.7	12	12.4	12.4	12.5	12.6	12.7	12.8	12.9	13	13.1	13.3	13.4	13.6	13.8
[truncated: 57 more columns]
