# Supplementary material for: Canines and carnassials as indicators of sociality in durophagous hyaenids: analyzing the past to understand the present
Source: PeerJ. 2020 Dec 15;8:e10541. doi: 10.7717/peerj.10541 (PMC7747684; doi:10.7717/peerj.10541)
Supplement: Table S2 — The numbers in brackets represent sample sizes. Asterisks in body mass (BM) indicate estimated values. [file peerj-08-10541-s002.xls]

## Sheet: Data
Species	Family/Ecomorph	LC	WC	LP4	Lc	Wc	Lm1	BM (kg)	Ref. Body mass	Ref. Dentition
Alopex lagopus	Canidae	6.3 (279)	3.8 (290)	13.8 (255)	7.2 (152)	3.9 (225)	13.7 (338)	3.66	a	1, 15, 17, 19, 18
Canis adustus	Canidae	7.2 (10)	4.5 (10)	14.9 (28)	8 (18)	4.9 (18)	17.1 (46)	8.85	a	9, 15, 21, 25
Canis aureus	Canidae	7.4 (8)	4.2 (8)	17.2 (28)	-	-	-	8.05	a	15, 25
Canis latrans	Canidae	8.7 (36)	5.3 (36)	19.6 (56)	9.8 (8)	6.4 (8)	21.6 (55)	19.65	a	1, 11, 17, 15
Canis lupus	Canidae	13.8 (37)	8 (37)	24.7 (55)	14 (9)	9.2 (9)	27.6 (49)	43.75	a	1, 15, 17, 22, 25
Canis mesomelas	Canidae	6.8 (33)	4.1 (33)	16.5 (44)	7.7 (25)	5.1 (25)	18.2 (61)	7.75	a	1, 9, 15, 17, 21
Canis simensis	Canidae	8.8 (6)	5.7 (6)	15.5 (17)	-	-	-	14.51	a	15, 25
Cerdocyon thous	Canidae	6.1 (25)	3.6 (25)	12.4 (8)	5.6 (1)	4.1 (1)	14.3 (6)	5.7	a	15, 17, 18, f1, f3
Chrysocyon brachyurus	Canidae	11.3 (23)	7.1 (23)	18.4 (5)	11.1 (1)	7.4 (1)	22.9 (4)	25	a	15, 17, 18, f3
Cuon alpinus	Canidae	9.7 (29)	5.7 (29)	19.7 (13)	10 (1)	6.6 (1)	21.1 (14)	14.5	a	11, 15, 17, f2, f8
Lycalopex culpaeus	Canidae	8.4 (24)	5.4 (24)	15.4 (10)	-	-	-	7.28	a	15, 17, 23
Lycalopex griseus	Canidae	5.4 (10)	3.3 (10)	11.3 (21)	-	-	-	3.65	a	15, 23
Lycalopex gymnocercus	Canidae	6.6 (113)	4.3 (117)	13.3 (132)	7.1 (117)	4.6 (117)	15.1 (128)	4.87	a	15, 16, 18
Lycalopex sechurae	Canidae	4.7 (5)	3 (5)	9.7 (10)	-	-	-	3.6	a	15, 23
Lycalopex vetulus	Canidae	4.5 (7)	3.2 (7)	8.1 (7)	5 (1)	3.5 (1)	9.6 (6)	3.35	a	15, 18, f3
Lycaon pictus	Canidae	11 (26)	7.1 (26)	20.7 (11)	10.8 (35)	7.9 (35)	24.4 (25)	22.75	a	12, 15, 17, 18, 22
Nyctereutes procyonoides	Canidae	5.4 (88)	3.7 (88)	10.4 (191)	5.4 (64)	3.8 (64)	12.2 (198)	5.33	a	13, 14, 15, 17, 18
Otocyon megalotis	Canidae	4.2 (28)	3.1 (28)	5.2 (9)	4.6 (1)	2.6 (1)	6 (9)	4.05	a	15, 17, 18
Speothos venaticus	Canidae	7.2 (26)	5.1 (26)	12.8 (14)	7.8 (1)	5.7 (1)	12.8 (13)	6.5	a	10, 15, 17, 18
Urocyon cinereoargenteus	Canidae	4.3 (36)	3 (36)	10.3 (88)	5.6 (8)	3.5 (8)	12.2 (88)	3.65	a	1, 11, 15, 17
Urocyon littoralis	Canidae	4.2 (10)	2.8 (10)	7.9 (10)	-	-	-	1.9	a	15
Vulpes bengalensis	Canidae	4.1 (7)	2.1 (7)	8.5 (8)	-	-	-	2.47	a	15, f9
Vulpes chama	Canidae	3.7 (10)	2.4 (10)	9.4 (11)	4.6 (16)	3.3 (16)	11.5 (26)	2.65	a	9, 15, f5
Vulpes macrotis	Canidae	4.5 (10)	2.8 (10)	9.4 (18)	-	-	-	2.1	a	11, 15, f4, f6
Vulpes pallida	Canidae	3.4 (7)	1.9 (7)	7.9 (7)	-	-	-	2.8	a	15
Vulpes ruepelli	Canidae	3.9 (10)	2.2 (10)	9.8 (10)	-	-	-	1.61	a	15
Vulpes velox	Canidae	4.6 (26)	3.1 (26)	10.7 (14)	5.6 (8)	3.4 (8)	12.2 (14)	2.6	b	1, 11, 17
Vulpes vulpes	Canidae	6.7 (1109)	4.3 (1237)	13.6 (1389)	7.8 (1180)	4.5 (1219)	15.4 (1355)	5.79	a	1, 15, 17, 20, 24
Vulpes zerda	Canidae	2.6 (8)	1.4 (8)	7.1 (8)	3 (1)	2.3 (1)	7.8 (7)	1.45	a	15, 18, f7
Acinonyx jubatus	Felidae	12.3 (64)	9.9 (64)	23.2 (51)	9.8 (52)	7.4 (52)	18.3 (52)	58.56	c	3, 4, 6, 17
Caracal caracal	Felidae	8.4 (106)	6.2 (106)	16.4 (88)	7.5 (88)	5.7 (88)	12.5 (88)	11.47	c	1, 3, 17
Felis chaus	Felidae	5.2 (8)	4.2 (8)	11.5 (8)	4.5 (8)	3.6 (8)	9.4 (8)	7.03	c	1
Felis lybica	Felidae	5.5 (88)	4.5 (88)	11.9 (88)	5.4 (88)	4.1 (88)	9.3 (88)	4.31	c	3
Leptailurus serval	Felidae	6.8 (26)	5.3 (26)	13 (8)	5.8 (8)	4.4 (8)	9.4 (8)	10.8	c	1, 17
Felis silvestris	Felidae	4.9 (8)	3.8 (8)	10.2 (8)	4.5 (8)	3.5 (8)	7.6 (8)	4.66	c	1
Leopardus colocolo	Felidae	5.6 (16)	3.9 (16)	11.9 (20)	5.4 (19)	4.1 (19)	9.2 (19)	3.5	d	8
Leopardus geoffroyi	Felidae	5.7 (65)	4 (66)	12.1 (72)	5.4 (63)	4 (62)	9.1 (66)	4.3	d	8
Leopardus guigna	Felidae	4.2 (8)	3.1 (8)	9.7 (8)	4.4 (7)	3.1 (7)	7.1 (6)	1.7	d	8
Leopardus tigrinus	Felidae	4.2 (35)	3.1 (35)	10 (35)	4.2 (34)	3.2 (34)	7.6 (34)	2.4	d	8
Leopardus wiedii	Felidae	5.3 (57)	3.8 (57)	10.9 (40)	5.2 (40)	3.8 (40)	8.2 (40)	3.3	d	8, 17
Lynx lynx	Felidae	9.4 (103)	7.5 (103)	18.2 (116)	8.6 (109)	6.6 (112)	16.4 (125)	18.35	j,i	5, 6
Lynx rufus	Felidae	6.1 (26)	4.9 (26)	13.7 (8)	6.3 (8)	5 (8)	10 (8)	8.75	j	1, 17
Neofelis nebulosa	Felidae	12.1 (36)	9 (36)	18.5 (18)	9.8 (17)	6.4 (18)	14 (17)	19.49	c	6, 7, 17
Panthera Leo	Felidae	20.7 (26)	15.8 (26)	34.8 (10)	20.3 (10)	14.5 (10)	26.4 (10)	154.47	c	1, 6, 17
Panthera onca	Felidae	15.2 (22)	12.5 (22)	25.4 (4)	14.7 (4)	11 (4)	18.6 (4)	78.55	j	2, 6, 17
Panthera pardus	Felidae	14.8 (107)	11.2 (106)	24.2 (161)	12.1 (139)	9.1 (150)	17.5 (175)	50.91	c	1, 6, 17
Panthera tigris	Felidae	24.8 (26)	18.1 (26)	31.9 (8)	21.3 (8)	15.8 (8)	24.3 (8)	159.17	c	1, 17
Puma concolor	Felidae	13.1 (35)	10.6 (35)	23 (21)	13.4 (19)	9.9 (19)	17.9 (18)	50.4	c	4, 6, 17
Puma yagouaroundi	Felidae	5.3 (66)	3.7 (66)	11.7 (50)	5 (47)	3.8 (47)	8.9 (47)	7.46	c	8, 17
Uncia uncia	Felidae	11.7 (30)	9.7 (30)	24.1 (29)	11.7 (20)	8.8 (25)	18 (28)	32.46	c	6, 17
Adcrocuta eximia	Hunting durophagous	17.2 (10)	13 (9)	37.8 (91)	16.6 (20)	13.3 (13)	27.6 (88)	67.9*	k	26, Supplentary Table 1
Crocuta crocuta (fossil)	Hunting durophagous	16.8 (114)	13.3 (116)	39.8 (116)	16.4 (152)	13.6 (135)	31.5 (263)	88.2*	f	26, Supplentary Table 1
Crocuta crocuta (living)	Hunting durophagous	16 (17)	11 (17)	36 (19)	14.9 (19)	11.5 (19)	28 (19)	62.8	h	26, Supplentary Table 1
Crocuta dietrichi	Hunting durophagous	-	-	-	12.8 (1)	9.6 (1)	24.7 (13)	-	-	26, Supplentary Table 1
Hyaena hyaena (fossil)	Scavenging durophagous	13.3 (13)	9.2 (13)	28.9 (29)	12.9 (15)	9.8 (15)	21.2 (20)	-	-	26, Supplentary Table 1
Hyena hyena (living)	Scavenging durophagous	14.1 (17)	10 (17)	29.5 (17)	14.3 (14)	10.6 (14)	20.4 (16)	36.3	h	26, Supplentary Table 1
Pachycrocuta brevirostris	Scavenging durophagous	20.8 (24)	15.2 (22)	41.2 (55)	21.5 (33)	16.9 (28)	29.2 (90)	110*	e	26, Supplentary Table 1
Parahyaena brunnea (fossil)	Scavenging durophagous	-	-	-	16.8 (3)	12.3 (3)	23.9 (9)	-	-	26, Supplentary Table 1
Parahyaena howelli	Scavenging durophagous	-	-	-	13.6 (5)	10.9 (5)	24.4 (4)	-	-	26, Supplentary Table 1
Parahyena brunnea (living))	Scavenging durophagous	16.1 (15)	11.8 (15)	34.2 (15)	16.9 (15)	12.8 (15)	23.3 (15)	40.3	h	26, Supplentary Table 1
Pliocrocuta perrieri	Scavenging durophagous	17.9 (21)	13.2 (22)	35.2 (66)	18.1 (30)	13.6 (26)	24.8 (103)	56.4*	g	26, Supplentary Table 1

## Sheet: References
Body Mass:
a:	Figueirido, B., Pérez-Claros, J. A., Hunt, R. M., & Palmqvist, P. (2011). Body mass estimation in amphicyonid carnivoran mammals: A multiple regression approach from the skull and skeleton. Acta Palaeontologica Polonica, 56(2), 225-246.
b:	Valkenburgh, B. V., & Ruff, C. B. (1987). Canine tooth strength and killing behaviour in large carnivores. Journal of Zoology, 212(3), 379-397.
c:	Gittleman, J. L. (1986). Carnivore brain size, behavioral ecology, and phylogeny. Journal of Mammalogy, 67(1), 23-36.
d:	de Oliveira, T. G., & Pereira, J. A. (2014). Intraguild predation and interspecific killing as structuring forces of carnivoran communities in South America. Journal of Mammalian Evolution, 21(4), 427-436.
e:	Palmqvist, P., Martínez-Navarro, B., Pérez-Claros, J. A., Torregrosa, V., Figueirido, B., Jiménez-Arenas, J. M., ... & De Renzi, M. (2011). The giant hyena Pachycrocuta brevirostris: modelling the bone-cracking behavior of an extinct carnivore. Quaternary International, 243(1), 61-79.
f:	Sauqué, V., Rabal-Garcés, R., Madurell-Malaperia, J., Gisbert, M., Zamora, S., de Torres, T., ... & Cuenca-Bescós, G. (2017). Pleistocene cave hyenas in the Iberian Peninsula: New insights from los aprendices cave (Moncayo, Zaragoza). Palaeontologia Electronica, 20(1), 1-38.
g:	Vinuesa, V., Madurell-Malapeira, J., Fortuny, J., & Alba, D. M. (2015). The Endocranial morphology of the Plio-Pleistocene bone-cracking hyena Pliocrocuta perrieri: Behavioral implications. Journal of Mammalian Evolution, 22(3), 421-434.
h:	Silva, M., & Downing, J. A. (1995). CRC handbook of mammalian body masses. CRC press.
i:	Andren, H., & Liberg, O. (2015). Large impact of Eurasian lynx predation on roe deer population dynamics. PloS one, 10(3).
j:	Sunquist, M., & Sunquist, F. (2017). Wild cats of the world. University of chicago press.
k:	Andersson, K. (2004). Predicting carnivoran body mass from a weight-bearing joint. Journal of Zoology, 262(2), 161-172.
Dentition:
1:	Gittleman, J. L., & Valkenburgh, B. V. (1997). Sexual dimorphism in the canines and skulls of carnivores: effects of size, phylogency, and behavioural ecology. Journal of Zoology, 242(1), 97-117.
2:	Kurtén, B. (1965). The Pleistocene Felidae of Florida: Florida State Mus. Biol. Sci., Bull, 9(6), 216-273.
3:	Kieser, J. A., & Groeneveld, H. T. (1991). Fluctuating odontometric asymmetry, morphological variability, and genetic monomorphism in the cheetah Acinonyx jubatus. Evolution, 45(5), 1175-1183.
4:	Van Valkenburgh, B., Grady, F., & Kurtén, B. (1990). The plio-pleistocene cheetah-like cat miracinonyx inexpectatus of North America. Journal of Vertebrate Paleontology, 10(4), 434-454.
5:	Gomerčić, T., Sindičić, M., Đuras Gomerčić, M., Gužvica, G., Frković, A., Pavlović, D., ... & Huber, Đ. (2010). Cranial morphometry of the Eurasian lynx (Lynx lynx L.) from Croatia. Veterinarski arhiv, 80(3), 393-410.
6:	Schmid, E. (1940). Variationsstatistische Untersuchungen am Gebiss pleistozäner und rezenter Leoparden und anderer Feliden. Zeitschrift für Säugetierkunde,15(10.12.1), 1-179.
7:	Christiansen, P., & Kitchener, A. C. (2011). A neotype of the clouded leopard (Neofelis nebulosa Griffith 1821). Mammalian Biology, 76(3), 325-331.
8:	Prevosti, F. J. (2006). New material of Pleistocene cats (Carnivora, Felidae) from Southern South America, with comments on biogeography and the fossil record. Geobios, 39(5), 679-694.
9:	Kieser, J. A., & Groeneveld, H. T. (1992). Comparative morphology of the mandibulodental complex in wild and domestic canids. Journal of anatomy, 180(Pt 3), 419.
10:	Berta, A. (1984). The pleistocene bush dog Speothos pacivorus (Canidae) from the Lagoa Santa caves, Brazil. Journal of Mammalogy, 65(4), 549-559.
11:	Tedford, R. H., Wang, X., & Taylor, B. E. (2009). Phylogenetic systematics of the North American fossil caninae (Carnivora: Canidae). Bulletin of the American Museum of Natural History, 2009(325), 1-218.
12:	Kieser, J. A., & Groeneveld, H. T. (1992). Mandibulodental allometry in the African wild dog, Lycaon pictus. Journal of anatomy, 181(Pt 1), 133.
13:	Kauhala, K., Viranta, S., Kishimoto, M., Helle, E., & Obara, I. (1998). Skull and tooth morphology of Finnish and Japanese raccoon dogs. Annales Zoologici Fennici, 35, 1-16.
14:	Kim, S. I., Suzuki, S., Oh, J., Koyabu, D., Oshida, T., Lee, H., ... & Kimura, J. (2012). Sexual dimorphism of craniodental morphology in the raccoon dog Nyctereutes procyonoides from South Korea. Journal of Veterinary Medical Science, 74(12), 1609-1616.
15:	Palmqvist, P., Mendoza, M., Arribas, A., & Grocke, D. R. (2002). Estimating the body mass of Pleistocene canids: discussion of some methodological problems and a new'taxon free' approach. Lethaia, 35(4), 358-360.
16:	Prevosti, F. J., & Lamas, L. (2006). Variation of cranial and dental measurements and dental correlations in the pampean fox (Dusicyon gymnocercus). Journal of Zoology, 270(4), 636-649.
17:	Valkenburgh, B. V., & Ruff, C. B. (1987). Canine tooth strength and killing behaviour in large carnivores. Journal of Zoology, 212(3), 379-397.
18:	Christiansen, P., & Adolfssen, J. S. (2005). Bite forces, canine strength and skull allometry in carnivores (Mammalia, Carnivora). Journal of Zoology, 266(2), 133-151.
19:	Szuma, E. (2008). Geographic variation of tooth and skull sizes in the arctic fox Vulpes (Alopex) lagopus. Annales Zoologici Fennici, 45(3), 185-199. Finnish Zoological and Botanical Publishing Board.
20:	Gingerich, P. D., & Winkler, D. A. (1979). Patterns of variation and correlation in the dentition of the red fox, Vulpes vulpes. Journal of Mammalogy, 60(4), 691-704.
21:	Ewer, R. F. (1956). The fossil carnivores of the Transvaal caves: Canidae. Proceedings of the Zoological Society of London, 126(1), 97-120.
22:	Hartstone-Rose, A., Werdelin, L., De Ruiter, D. J., Berger, L. R., & Churchill, S. E. (2010). The Plio-Pleistocene ancestor of wild dogs, Lycaon sekowei n. sp. Journal of Paleontology, 84(2), 299-308.
23:	Vivar, E., & Pacheco, V. (2014). Estado del zorro gris Lycalopex griseus (Gray, 1837)(Mammalia: Canidae) en el Perú. Revista peruana de biología, 21(1), 071-078.
24:	Szuma, E. (2000). Variation and correlation patterns in the dentition of the red fox from Poland. Annales Zoologici Fennici, 37, 113-127.
25:	Rook, L., Luisa, M., Puccetti, A., & Azzaroli, A. (1996). Remarks on the skull morphology of the endangered Ethiopian jackal, Canis simensis Rappel 1838. Rendiconti Lincei, 7(4), 277.
26:	Coca-Ortega, C., & Pérez-Claros, J. A. (2019). Characterizing ecomorphological patterns in hyenids: a multivariate approach using postcanine dentition. PeerJ, 6, e6238.
From scaled Figures in:
f1:	Berta, A. (1982). Cerdocyon thous. Mammalian species, (186), 1-4.
f2:	Berkovitz, B. & Shellis, P. (2018). The Teeth of Mammalian Vertebrates. Academic Press.
f3:	Segura, V. (2014). Ontogenia craneana postnatal en cánidos y félidos neotropicales: funcionalidad y patrones evolutivos. Mastozoología Neotropical, 21(1), 190-191.
f4:	McGrew, J. C. (1979). Vulpes macrotis. Mammalian species, (123), 1-6.
f5:	Lavoie, M., Renard, A., Pitt, J. A., & Larivière, S. (2019). Vulpes chama (Carnivora: Canidae). Mammalian Species, 51(972), 11-17.
f6:	Yanagisawa, N., Wilson, R. E., Kass, P. H., & Verstraete, F. J. M. (2019). Dental and Temporomandibular Joint Pathology of the Kit Fox (Vulpes macrotis). Journal of comparative pathology, 167, 60-72.
f7:	Larivière, S. (2002). Vulpes zerda. Mammalian Species, 2002(714), 1-5.
f8:	Mivart, S. G. (1890). Dogs, Jackals, Wolves and Foxes. A Monograph of the Canidae. RH Porter, London.
f9:	Gompper, M. E., & Vanak, A. T. (2006). Vulpes bengalensis. Mammalian Species, 2006(795), 1-5.
